# Supplementary material for: Enhanced H2 evolution over an Ir-doped SrTiO3 photocatalyst by loading of an Ir cocatalyst using visible light up to 800 nm
Source: Royal Society of Chemistry journal article supplement (doi:10.1039/c8cc05344h), 2018-01-01
Supplement: c8cc05344h1.pdf [file c8cc05344h1.pdf]

## Supporting information

### Enhanced H<sub>2</sub> evolution over Ir-doped SrTiO<sub>3</sub> photocatalyst by loading of Ir-cocatalyst using visible light up to 800 nm

Sho Suzuki, Hiroe Matsumoto, Akihide Iwase, Akihiko Kudo

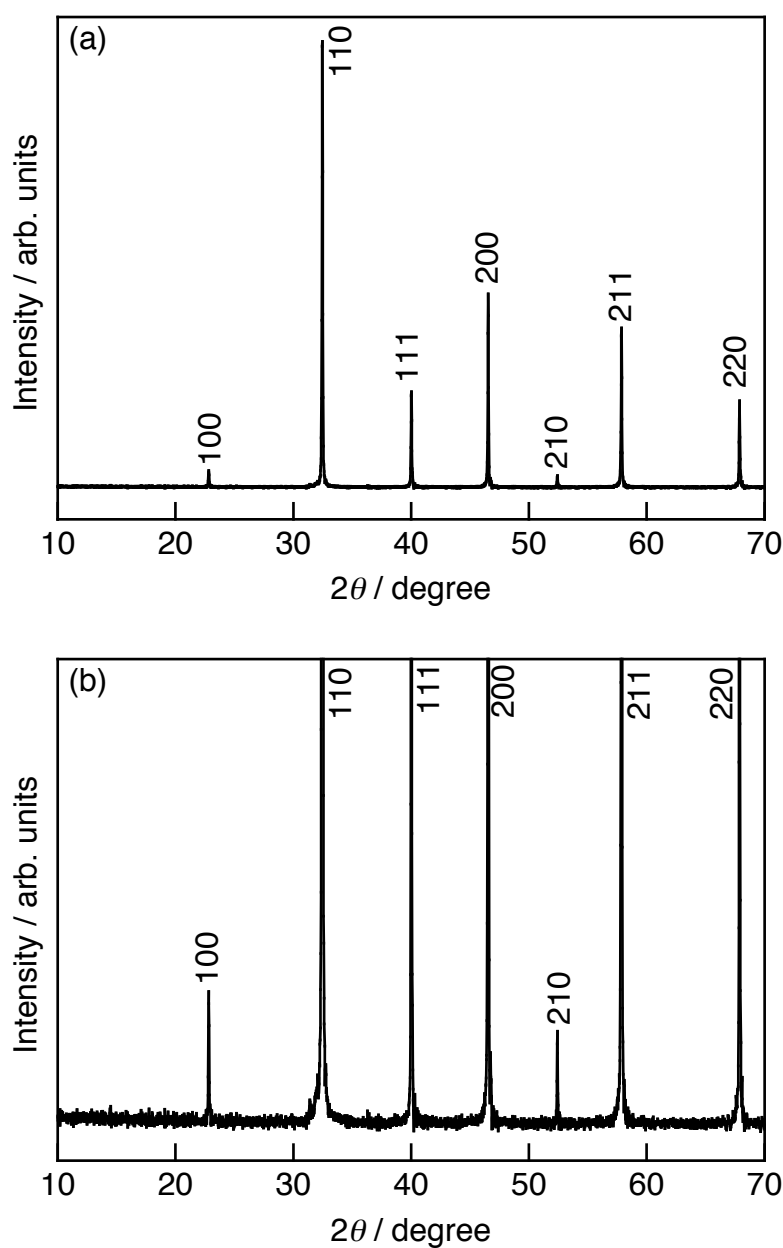

**Figure S1.** XRD pattern of SrTiO<sub>3</sub> doped with Ir(0.2%) prepared by a solid-state reaction at 1273 K. (a) Full and (b) enlarged scale.

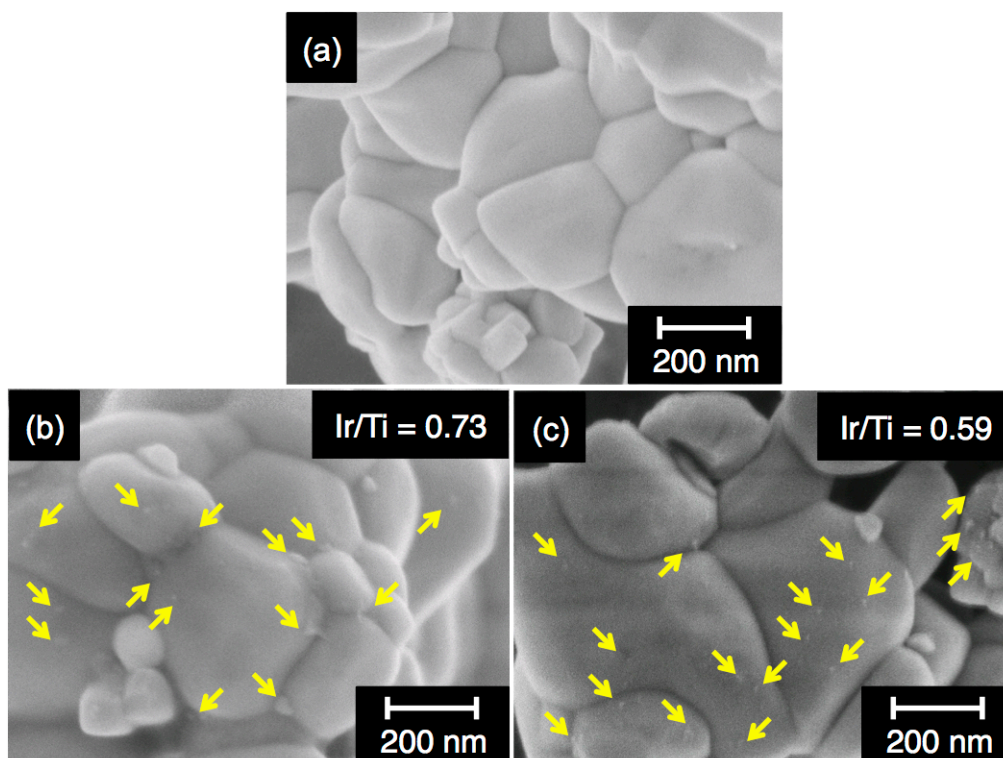

**Figure S2.** SEM images of (a) bare  $\text{SrTiO}_3\text{:Ir}$  and (b,c) Ir-loaded  $\text{SrTiO}_3\text{:Ir}$ . The Ir was loaded by impregnation at 673K for 2 h (b) without and (c) with subsequent  $\text{H}_2$  reduction at 673K for 1 h. The atomic ratio of Ir/Ti at the surface was estimated by XPS measurements.
